# Supplementary material for: Two-photon absorption of 28-hetero-2,7-naphthiporphyrins: expanded carbaporphyrinoid macrocycles
Source: Royal Society of Chemistry journal article supplement (doi:10.1039/d2ra03167a), 2022-01-01
Supplement: d2ra03167a1.pdf [file d2ra03167a1.pdf]

## Supplementary Information

### **Two-photon absorption of 28-hetero-2,7-naphthiporphyrins: expanded carbaporphyrinoid macrocycles**

Emma Robbins,<sup>1,2</sup> Radosław Deska,<sup>1</sup> Katarzyna Ślusarek,<sup>3</sup> Marta Dudek,<sup>1</sup> Marek Samoć,<sup>1</sup>

Lechosław Latos-Grażyński,<sup>3</sup> Bartosz Szyszko<sup>3\*</sup> and Katarzyna Matczyszyn<sup>1\*</sup>

1 Advanced Materials Engineering and Modelling Group, Faculty of Chemistry, Wrocław University of Science and Technology, Wybrzeże Wyspińskiego 27, 50-370 Wrocław, Poland.

2 Laboratoire PEIRENE, Université de Limoges, 123 avenue Albert Thomas, 87060 Limoges, France.

3 Department of Chemistry, University of Wrocław, 14 F. Joliot-Curie St., 50-383 Wrocław, Poland

\*E-mail: katarzyna.matczyszyn@pwr.edu.pl, bartosz.szyszko@uwr.edu.pl

**Table S1.** Re ( $\gamma$ ) and Im ( $\gamma$ ) values for **1-S**

| <b>Wavelength<br/>(nm)</b> | <b>Re (<math>\gamma</math>)<br/>(esu)</b> | <b>error</b>            | <b>Im (<math>\gamma</math>)<br/>(esu)</b> | <b>Error</b>            |
|----------------------------|-------------------------------------------|-------------------------|-------------------------------------------|-------------------------|
| <b>850</b>                 | -3.5712E-33                               | $\pm 1.9607\text{E-}34$ | -4.0405E-34                               | $\pm 3.4043\text{E-}34$ |
| <b>900</b>                 | -1.0569E-33                               | $\pm 3.9483\text{E-}35$ | 5.1589E-34                                | $\pm 3.5625\text{E-}35$ |
| <b>950</b>                 | -6.0751E-34                               | $\pm 5.0957\text{E-}35$ | 5.1412E-34                                | $\pm 5.0861\text{E-}35$ |
| <b>1000</b>                | -5.6313E-34                               | $\pm 5.7903\text{E-}35$ | 4.6744E-34                                | $\pm 5.3860\text{E-}35$ |
| <b>1050</b>                | -7.7451E-34                               | $\pm 8.1332\text{E-}35$ | 3.2578E-34                                | $\pm 4.0916\text{E-}35$ |
| <b>1100</b>                | -3.2338E-35                               | $\pm 1.0474\text{E-}34$ | 1.6777E-34                                | $\pm 7.9820\text{E-}35$ |
| <b>1150</b>                | -4.1194E-34                               | $\pm 7.8589\text{E-}35$ | 1.8050E-34                                | $\pm 3.3598\text{E-}35$ |
| <b>1200</b>                | -6.5620E-36                               | $\pm 1.0432\text{E-}34$ | 9.4727E-35                                | $\pm 5.0521\text{E-}35$ |
| <b>1250</b>                | -8.1504E-36                               | $\pm 1.0468\text{E-}34$ | 9.2861E-35                                | $\pm 4.9057\text{E-}35$ |
| <b>1300</b>                | 2.7659E-34                                | $\pm 2.8590\text{E-}35$ | 1.4359E-34                                | $\pm 1.4983\text{E-}35$ |
| <b>1350</b>                | -6.9624E-35                               | $\pm 1.0043\text{E-}34$ | 7.3030E-35                                | $\pm 3.1118\text{E-}35$ |
| <b>1400</b>                | 2.5975E-35                                | $\pm 4.8883\text{E-}35$ | 1.8172E-35                                | $\pm 9.6878\text{E-}36$ |
| <b>1450</b>                | -1.2292E-34                               | $\pm 3.3516\text{E-}35$ | 1.7410E-35                                | $\pm 5.5425\text{E-}36$ |
| <b>1500</b>                | -1.8465E-35                               | $\pm 2.1148\text{E-}35$ | 1.4788E-35                                | $\pm 7.6184\text{E-}36$ |
| <b>1550</b>                | 1.4659E-34                                | $\pm 2.6043\text{E-}35$ | 2.0025E-35                                | $\pm 5.0892\text{E-}36$ |
| <b>1600</b>                | 1.4230E-34                                | $\pm 1.1845\text{E-}34$ | 3.1836E-35                                | $\pm 1.2892\text{E-}35$ |

**Table S2.** Re ( $\gamma$ ) and Im ( $\gamma$ ) values for **1-Se** (0.5 % w/w)

| <b>Wavelength<br/>(nm)</b> | <b>Re (<math>\gamma</math>)<br/>(esu)</b> | <b>error</b>            | <b>Im (<math>\gamma</math>)<br/>(esu)</b> | <b>Error</b>            |
|----------------------------|-------------------------------------------|-------------------------|-------------------------------------------|-------------------------|
| <b>800</b>                 | -2.2530E-32                               | $\pm 1.4274\text{E-}34$ | 2.4708E-33                                | $\pm 2.7471\text{E-}35$ |
| <b>850</b>                 | -8.4909E-33                               | $\pm 8.7946\text{E-}35$ | 1.5705E-33                                | $\pm 3.0595\text{E-}35$ |
| <b>900</b>                 | -3.4993E-33                               | $\pm 1.2769\text{E-}34$ | 1.0889E-33                                | $\pm 1.1327\text{E-}34$ |
| <b>950</b>                 | -2.0670E-33                               | $\pm 1.3024\text{E-}34$ | 8.2694E-34                                | $\pm 6.7660\text{E-}35$ |
| <b>1000</b>                | -3.2017E-33                               | $\pm 2.8715\text{E-}34$ | 8.2243E-34                                | $\pm 1.2636\text{E-}34$ |
| <b>1050</b>                | -6.5996E-34                               | $\pm 1.1752\text{E-}34$ | 3.1765E-34                                | $\pm 5.0098\text{E-}35$ |
| <b>1100</b>                | ---                                       | ---                     | ---                                       | ---                     |
| <b>1150</b>                | -3.4492E-34                               | $\pm 9.9717\text{E-}35$ | 1.9433E-34                                | $\pm 4.1586\text{E-}35$ |
| <b>1200</b>                | 2.5051E-34                                | $\pm 9.7469\text{E-}35$ | 8.3267E-35                                | $\pm 2.3968\text{E-}35$ |
| <b>1250</b>                | 2.1539E-34                                | $\pm 7.2103\text{E-}35$ | 7.4886E-35                                | $\pm 2.0662\text{E-}35$ |
| <b>1300</b>                | -2.7029E-34                               | $\pm 1.6976\text{E-}34$ | 1.0195E-34                                | $\pm 3.4529\text{E-}35$ |
| <b>1350</b>                | 8.4391E-35                                | $\pm 1.0740\text{E-}34$ | 6.6697E-35                                | $\pm 2.9714\text{E-}35$ |
| <b>1400</b>                | -1.7606E-34                               | $\pm 3.8140\text{E-}35$ | 1.6705E-34                                | $\pm 3.8140\text{E-}35$ |
| <b>1450</b>                | 1.3140E-34                                | $\pm 3.5888\text{E-}35$ | 3.2753E-35                                | $\pm 1.1400\text{E-}35$ |
| <b>1500</b>                | 4.8934E-34                                | $\pm 3.8474\text{E-}35$ | 1.3134E-35                                | $\pm 6.5016\text{E-}36$ |
| <b>1550</b>                | 3.0352E-34                                | $\pm 2.7326\text{E-}35$ | 2.0087E-35                                | $\pm 7.1425\text{E-}36$ |
| <b>1600</b>                | -1.2421E-34                               | $\pm 1.7239\text{E-}34$ | 9.4166E-36                                | $\pm 9.1641\text{E-}36$ |

**Table S3.** Re ( $\gamma$ ) and Im ( $\gamma$ ) values for **1-Se** (1 % w/w)

| <b>Wavelength<br/>(nm)</b> | <b>Re (<math>\gamma</math>)<br/>(esu)</b> | <b>error</b>            | <b>Im (<math>\gamma</math>)<br/>(esu)</b> | <b>Error</b>            |
|----------------------------|-------------------------------------------|-------------------------|-------------------------------------------|-------------------------|
| <b>850</b>                 | -6.1452E-33                               | $\pm 8.4422\text{E-}35$ | 1.3120E-33                                | $\pm 3.3297\text{E-}35$ |
| <b>900</b>                 | -2.7047E-33                               | $\pm 4.1470\text{E-}35$ | 1.2136E-33                                | $\pm 5.1846\text{E-}35$ |
| <b>950</b>                 | -1.5170E-33                               | $\pm 7.0320\text{E-}35$ | 7.2819E-34                                | $\pm 7.6222\text{E-}35$ |
| <b>1000</b>                | -3.1919E-33                               | $\pm 7.3253\text{E-}35$ | 7.9244E-34                                | $\pm 4.1943\text{E-}35$ |
| <b>1050</b>                | -6.7376E-34                               | $\pm 5.1846\text{E-}35$ | 3.0357E-34                                | $\pm 2.6953\text{E-}35$ |
| <b>1100</b>                | -2.7857E-34                               | $\pm 6.6347\text{E-}35$ | 2.3092E-34                                | $\pm 4.3349\text{E-}35$ |
| <b>1150</b>                | -1.3201E-34                               | $\pm 5.5265\text{E-}35$ | 1.9410E-34                                | $\pm 4.8031\text{E-}35$ |
| <b>1200</b>                | 2.5404E-34                                | $\pm 5.1289\text{E-}35$ | 7.9727E-35                                | $\pm 1.4383\text{E-}35$ |
| <b>1250</b>                | ---                                       | ---                     | ---                                       | ---                     |
| <b>1300</b>                | 1.2098E-34                                | $\pm 5.9971\text{E-}35$ | 6.2148E-35                                | $\pm 1.8356\text{E-}35$ |
| <b>1350</b>                | -2.5817E-34                               | $\pm 1.9852\text{E-}35$ | 1.5858E-34                                | $\pm 1.3471\text{E-}35$ |
| <b>1400</b>                | -2.5401E-34                               | $\pm 1.9531\text{E-}35$ | 1.9840E-34                                | $\pm 1.6311\text{E-}35$ |
| <b>1450</b>                | 4.2092E-34                                | $\pm 2.5617\text{E-}35$ | 6.4640E-35                                | $\pm 6.2627\text{E-}36$ |
| <b>1500</b>                | 3.6763E-34                                | $\pm 2.0335\text{E-}35$ | 4.1559E-35                                | $\pm 4.8093\text{E-}36$ |
| <b>1550</b>                | 3.0683E-34                                | $\pm 1.4194\text{E-}35$ | 1.2467E-35                                | $\pm 3.2569\text{E-}36$ |
| <b>1600</b>                | 1.6596E-34                                | $\pm 8.9892\text{E-}35$ | 1.4761E-35                                | $\pm 6.6268\text{E-}36$ |

**Table S4.** Re ( $\gamma$ ) and Im ( $\gamma$ ) values for **1-Te**

| <b>Wavelength<br/>(nm)</b> | <b>Re (<math>\gamma</math>)<br/>(esu)</b> | <b>error</b>     | <b>Im (<math>\gamma</math>)<br/>(esu)</b> | <b>Error</b>     |
|----------------------------|-------------------------------------------|------------------|-------------------------------------------|------------------|
| <b>850</b>                 | -1.5991E-32                               | $\pm 1.8994E-34$ | 1.8281E-33                                | $\pm 3.9522E-35$ |
| <b>900</b>                 | -9.8715E-33                               | $\pm 1.8995E-34$ | 3.3992E-33                                | $\pm 1.2810E-34$ |
| <b>950</b>                 | -6.6772E-33                               | $\pm 1.6082E-34$ | 2.0280E-33                                | $\pm 1.0617E-34$ |
| <b>1000</b>                | -3.0667E-33                               | $\pm 2.2408E-34$ | 2.2579E-33                                | $\pm 2.6977E-34$ |
| <b>1050</b>                | -3.4158E-33                               | $\pm 7.2700E-35$ | 9.8483E-34                                | $\pm 5.5928E-35$ |
| <b>1100</b>                | -2.9073E-33                               | $\pm 8.0462E-35$ | 9.8639E-34                                | $\pm 6.5957E-35$ |
| <b>1150</b>                | -2.1331E-33                               | $\pm 1.2029E-34$ | 7.2780E-34                                | $\pm 6.0488E-35$ |
| <b>1200</b>                | -3.6965E-34                               | $\pm 1.1786E-34$ | 3.7742E-34                                | $\pm 8.2618E-35$ |
| <b>1250</b>                | -1.4449E-34                               | $\pm 1.0024E-34$ | 3.3036E-34                                | $\pm 1.0336E-34$ |
| <b>1300</b>                | -9.2090E-34                               | $\pm 1.8682E-34$ | 3.3036E-34                                | $\pm 5.6353E-35$ |
| <b>1350</b>                | -5.1634E-34                               | $\pm 3.9687E-35$ | 3.1717E-34                                | $\pm 2.6925E-35$ |
| <b>1400</b>                | -5.0801E-34                               | $\pm 3.9046E-35$ | 3.9680E-34                                | $\pm 3.2600E-35$ |
| <b>1450</b>                | 3.5505E-35                                | $\pm 3.6276E-35$ | 2.3048E-34                                | $\pm 8.2894E-35$ |
| <b>1500</b>                | 3.3079E-34                                | $\pm 5.0641E-35$ | 1.9903E-34                                | $\pm 2.8924E-35$ |
| <b>1550</b>                | 2.5975E-34                                | $\pm 5.9120E-35$ | 1.2634E-34                                | $\pm 2.5339E-35$ |
| <b>1600</b>                | -3.6852E-34                               | $\pm 2.3003E-34$ | 1.2064E-34                                | $\pm 4.2738E-35$ |
